# Supplementary material for: Epidemiological characteristics of pulmonary tuberculosis in mainland China from 2004 to 2015: a model-based analysis
Source: PubMed Central journal article supplement (PMC6383277; doi:10.1186/s12889-019-6544-4), 2019-02-21
Supplement: 12889_2019_6544_MOESM1_ESM.pdf [file 12889_2019_6544_MOESM1_ESM.pdf]

1 **Additional file**

2 We describe in detail the structure of the model below.

3 **Construction of the model**

4 Based on the epidemiologic characteristics of pulmonary tuberculosis described in

5 Figure 1, we devised the following system of discrete difference equations:

$$\begin{aligned} S(t+1) &= (1 - \mu_d)S(t) + \mu_b N(t) - \beta(t)p(t)I_a(t)S(t) / N(t) + \kappa_s \alpha r_1 q_1 T(t) + \kappa_s (1 - \alpha) r_2 q_2 T(t) \\ E(t+1) &= (1 - \mu_d)E(t) + \lambda \beta(t)p(t)I_a(t)S(t) / N(t) + \delta I_p(t) + d_h I_a(t) + \kappa_f \alpha r_1 q_1 T(t) + \kappa_f (1 - \alpha) r_2 q_2 T(t) \\ &\quad - \theta E(t) - \beta(t)p(t)I_a(t)E(t) / N(t) \\ I_a(t+1) &= (1 - \mu_d)I_a(t) + \beta(t)p(t)I_a(t)E(t) / N(t) + \theta E(t) - Q_a(t) - d_f I_a(t) - d_h I_a(t) \\ 6 \quad E_p(t+1) &= (1 - \mu_d)E_p(t) + (1 - \lambda)\beta(t)p(t)I_a(t)S(t) / N(t) - \tau E_p(t) \\ I_p(t+1) &= (1 - \mu_d)I_p(t) + \tau E_p(t) - \delta I_p(t) - Q_p(t) \\ T(t+1) &= (1 - \mu_d)T(t) + Q_a(t) + Q_p(t) - (\kappa_f + \kappa_s)\alpha r_1 q_1 T(t) - (\kappa_f + \kappa_s)(1 - \alpha) r_2 q_2 T(t) - d_t r_s T(t) \\ N(t) &= S(t) + E(t) + I_a(t) + E_p(t) + I_p(t) + T(t) \end{aligned}$$

7 (a1)

$$\begin{aligned} Q_a(t) &= \nu \int_{t-1}^t \sum_{k=0}^{t-1} \Delta^+ I_a(k) f(s - k + 0.5) \exp\{-(d_f + d_h)(s - k + 0.5)\} ds \\ 8 \quad Q_p(t) &= \nu \int_{t-1}^t \sum_{k=0}^{t-1} \Delta^+ I_p(k) f(s - k + 0.5) \exp\{-(d_f + d_h)(s - k + 0.5)\} ds \\ \Delta^+ I_a(t) &= p(t)\beta(t)I_a(t)E(t) / N(t) + \theta E(t) \\ \Delta^+ I_p(t) &= \tau E_p(t) \end{aligned} \quad (a2)$$

9  $S(t)$  represents individuals who are susceptible to *M. tuberculosis* and not infected

10 with *M. tuberculosis* at time  $t$  ( $t = 0, 1, 2, \dots, 144$ ) (equation a1). The rate of increase

11 includes three components: one is  $\mu_b N(t)$ , which denotes the growth rate of

12 newborns in China at time  $t$ , as they have no immunity to tuberculosis and are

13 considered to be susceptible; the remaining components are  $\kappa_s \alpha r_1 q_1 T(t)$  and

1  $\kappa_s(1 - \alpha)r_2q_2T(t)$ , which represent the rates of complete cure (the *M. tuberculosis*  
2 bacteria in the body are completely eliminated) after treatment in patients infected  
3 with non-MDR-TB and MDR-TB, respectively. The rate of reduction includes two  
4 components: one is  $\mu_d S(t)$ , which represents the rate at which the susceptible  
5 population is reduced by natural death at time  $t$ ; the other is  $\beta(t)p(t)I_a(t)S(t) / N(t)$ ,  
6 which represents the rate at which a susceptible person is infected by *M. tuberculosis*  
7 at time  $t$ .  $\beta(t)$  represents the adequate contact rate.  $p(t)I_a(t)$  represents the number  
8 of infectious patients (positive sputum smear or sputum culture).  $p(t)$  represents the  
9 proportion of infectious patients among newly diagnosed pulmonary tuberculosis  
10 patients, and its value varies with time (Table a1). We used  $p(t)$  to replace the  
11 proportion of infectious patients in  $I_a(t)$ .

12  $E(t)$  denotes infected individuals who have been infected with *M. tuberculosis* but  
13 who are in the incubation period and have not yet developed active disease at time  $t$ .  
14 The rate of growth includes five components:  $\lambda p(t)\beta(t)I_a(t)S(t) / N(t)$  represents  
15 the growth rate of infected individuals who do not develop active disease. This occurs  
16 because a small number of susceptible people do not show symptoms after infection,  
17 and this group of infected people transition to state  $E$ .  $\delta I_p(t)$  represents the rate of  
18 spontaneous recovery without treatment in patients with primary pulmonary  
19 tuberculosis. Because *M. tuberculosis* is difficult to completely eradicate due to  
20 spontaneous recovery, these individuals convert to state  $E$ .  $\kappa_f \alpha r_1 q_1 T(t)$  and  
21  $\kappa_f(1 - \alpha)r_2q_2T(t)$  represent the rates of treatment failure in patients with non-MDR-  
22 TB and MDR-TB infection, respectively. Treatment failure indicates that a patient's

1 symptoms and infectiousness resolve but the patient is not cured; the *M. tuberculosis*  
 2 bacteria in the body are not completely removed, and the patient transitions to state  $E$  ;  
 3  $d_h I_a(t)$  represents the rate of spontaneous recovery of patients with secondary  
 4 tuberculosis. The rate of reduction of  $E(t)$  includes three components:  $\mu_d E(t)$   
 5 represents the rate of natural death in state  $E(t)$  ;  $\theta E(t)$  represents the rate at which  
 6 an infected person develops disease due to reduced immunity and subsequent  
 7 proliferation of *M. tuberculosis* already in the body; and  $\beta(t)p(t)I_a(t)E(t) / N(t)$   
 8 represents the rate at which an infected person develops disease due to contact with a  
 9 contagious secondary tuberculosis patient.

10  $I_a(t)$  represents the number of patients with secondary pulmonary tuberculosis who  
 11 have not been diagnosed at time  $t$  . Its rate of increase depends on two components:  
 12  $\beta(t)p(t)I_a(t)E(t) / N(t)$  and  $\theta E(t)$  . The rate of reduction depends on four  
 13 components: the rate of natural death  $\mu_d I_a(t)$  ; the rate of diagnosis  $Q_a(t)$  , which is  
 14 computed as shown in equation a2; and  $d_f I_a(t)$  and  $d_h I_a(t)$  , which represent the rates  
 15 of death and spontaneous recovery, respectively, assuming that the distributions of  
 16 death and spontaneous recovery are exponential such that  $d_f$  and  $d_h$  are constants.

17  $E_p(t)$  denotes the number of infected people in the incubation period at time  $t$  . The  
 18 growth rate is  $(1 - \lambda)\beta(t)p(t)I_a(t)S(t) / N(t)$  , indicating the growth rate of infected  
 19 persons with symptoms. In addition to natural deaths, the rate of decline also includes  
 20 the rate of conversion from the incubation period to primary pulmonary tuberculosis  
 21  $\tau E_p(t)$  .

1  $I_p(t)$  represents the number of primary pulmonary tuberculosis patients who have not  
2 been treated at time  $t$ . The growth rate is  $\tau E_p(t)$ . In addition to natural deaths, the  
3 rate of reduction includes the rate of self-healing  $\delta I_p(t)$  as well as  $Q_p(t)$ , which  
4 represents the rate at which patients with primary tuberculosis are diagnosed.

5  $T(t)$  indicates the number of pulmonary tuberculosis patients being treated at time  $t$ .  
6 The rate of increase consists of the rates of diagnosis of patients with secondary and  
7 primary tuberculosis,  $Q_a(t)$  and  $Q_p(t)$ . In addition to natural death, the rate of  
8 decrease also includes  $(\kappa_f + \kappa_s)\alpha r_1 q_1 T(t)$  and  $(\kappa_f + \kappa_s)(1 - \alpha)r_2 q_2 T(t)$ , which  
9 represent the rates at which symptoms disappear after a complete course of treatment  
10 in patients with non-MDR-TB and MDR-TB, respectively;  $d_t r_s T(t)$  represents the  
11 rate at which patients die after a complete course of treatment. Mortality information  
12 for treated patients with non-MDR-TB and MDR-TB is unavailable in the relevant  
13 literature. Instead, we eventually determine the mortality of treated patients of both  
14 types,  $d_t$ , and the rate of treatment completion,  $r_s$ . Therefore, we must discuss  
15 mortality in both cases.

16  $Q_a(t)$  and  $Q_p(t)$  represent the rates of diagnosis of patients with secondary and  
17 primary pulmonary tuberculosis in month  $t$ , respectively (equation a2). We assume  
18 that  $I_a(t)$  and  $I_p(t)$  include new secondary and primary tuberculosis patients over  
19 several months before month  $t$ . Each month, a proportion  $\nu$  of the newly diagnosed  
20 patients choose to receive treatment; the remaining patients  $(1 - \nu)$  do not pursue  
21 treatment. Only patients who choose to receive treatment are counted as diagnosed  
22 cases. As shown in equation a2, any month before month  $t$  is represented by  $k$  (

1  $o \leq k \leq t - 1$ , with  $o$  indicating that a certain month occurs long before month  $t$ ).

2 The rates of increase in states  $I_a$  and  $I_p$  in the  $k$  th month and are represented by

3  $\Delta^+ I_a(k)$  and  $\Delta^+ I_p(k)$ , respectively, with  $f(\bullet)$  representing the probability density

4 function from onset to the time of diagnosis. We assume that the density function

5 follows one of three possible distributions: a gamma distribution, a Weibull

6 distribution, or a log-normal distribution.

7  $v \sum_{k=o}^{t-1} \Delta^+ I_a(k) f(s - k + 0.5) \exp\{-(d_f + d_h)(s - k + 0.5)\}$  represents the number of

8 secondary pulmonary tuberculosis cases that occur before the  $t$  th month and are

9 diagnosed at  $s$  ( $t - 1 \leq s \leq t$ ). The number of patients with secondary pulmonary

10 tuberculosis diagnosed in the  $t$  th month was obtained by integrating  $s$  in the  $t$  th

11 month. Because the equation is discrete, 0.5 means that the monthly increase in the

12 number of patients is adjusted to the middle of the current month. According to our

13 calculations, the majority of cases diagnosed in any month is mostly from new

14 infections occurring in the preceding 5 months.

## 15 **Setting initial values**

16 According to the literature, approximately 550 million people were infected with *M.*

17 *tuberculosis* in China in 2004 [1]. According to the fifth national census in 2000, the

18 country has a total population of approximately 1.24 billion [2]. From these data, we

19 obtained the initial values of  $S$  and  $E$ . The initial values of  $I_a$ ,  $I_p$ ,  $E_p$ , and  $T$  are

20 estimated based on the solution when the equation is at equilibrium and estimated

21 based on the total population prevalence in the 4th national pulmonary tuberculosis

22 survey in 2000.

1 **Epidemiological indicators of the model outputs**

2 Trends in newly diagnosed pulmonary tuberculosis cases come from the raw data.

3 Trends in adequate contact rate over time are obtained by fitting the model with the

4 published number of newly diagnosed pulmonary tuberculosis cases. Trends in

5 prevalence and infection rate in the total population are expressed as

6  $(I_a(t) + I_p(t)) / N(t)$  and  $E(t) / N(t)$  respectively. Trends in the number of

7 infectious patients over time are expressed as  $p(t)I_a(t)$ . Trends in the growth rates of

8 new infections and new cases are expressed as  $\beta(t)p(t)I_a(t)S(t) / N(t)$  and

9  $\beta(t)p(t)I_a(t)E(t) / N(t) + \theta E(t) + \tau E_p(t)$  respectively. The meanings of each

10 formula have been explained previously.

11

12

Table a1. Raw data

| Time     | Number of patients with positive sputum culture | Number of patients with positive sputum smear | Number of patients with negative sputum | Number of patients not tested | Ratio of infectious patients | Total number of patients |
|----------|-------------------------------------------------|-----------------------------------------------|-----------------------------------------|-------------------------------|------------------------------|--------------------------|
| Jan 2004 | 103                                             | 37803                                         | 28711                                   | 32849                         | 0.569                        | 99466                    |
| Feb 2004 | 109                                             | 31324                                         | 24064                                   | 28659                         | 0.566                        | 84156                    |
| Mar 2004 | 106                                             | 34638                                         | 27662                                   | 31954                         | 0.557                        | 94360                    |
| Apr 2004 | 145                                             | 32411                                         | 26891                                   | 32497                         | 0.548                        | 91944                    |
| May 2004 | 140                                             | 32834                                         | 26520                                   | 30885                         | 0.554                        | 90379                    |
| Jun 2004 | 123                                             | 31922                                         | 25831                                   | 29785                         | 0.554                        | 87661                    |

|          |     |       |       |       |       |        |
|----------|-----|-------|-------|-------|-------|--------|
| Jul 2004 | 132 | 31315 | 25323 | 28347 | 0.554 | 85117  |
| Aug 2004 | 136 | 31850 | 24691 | 29183 | 0.564 | 85860  |
| Sep 2004 | 137 | 28173 | 22339 | 26037 | 0.559 | 76686  |
| Oct 2004 | 94  | 27402 | 22075 | 26253 | 0.555 | 75824  |
| Nov 2004 | 77  | 20134 | 17977 | 23381 | 0.529 | 61569  |
| Dec 2004 | 40  | 9695  | 9722  | 17800 | 0.500 | 37257  |
| Jan 2005 | 130 | 47567 | 37090 | 29407 | 0.563 | 114194 |
| Feb 2005 | 101 | 35990 | 28895 | 22126 | 0.555 | 87112  |
| Mar 2005 | 156 | 56228 | 44007 | 29743 | 0.562 | 130134 |
| Apr 2005 | 167 | 57990 | 45607 | 30160 | 0.560 | 133924 |
| May 2005 | 159 | 52877 | 39864 | 28426 | 0.571 | 121326 |
| Jun 2005 | 138 | 52941 | 40539 | 27047 | 0.567 | 120665 |
| Jul 2005 | 138 | 52941 | 40539 | 27047 | 0.567 | 120665 |
| Aug 2005 | 153 | 47435 | 34322 | 25066 | 0.581 | 106976 |
| Sep 2005 | 114 | 42640 | 31158 | 21829 | 0.578 | 95741  |
| Oct 2005 | 122 | 39048 | 28610 | 22021 | 0.578 | 89801  |
| Nov 2005 | 124 | 39188 | 28444 | 21620 | 0.580 | 89376  |
| Dec 2005 | 79  | 26349 | 20308 | 18471 | 0.565 | 65207  |
| Jan 2006 | 124 | 53121 | 45341 | 22849 | 0.540 | 121435 |
| Feb 2006 | 125 | 45322 | 38498 | 21324 | 0.541 | 105269 |
| Mar 2006 | 153 | 47588 | 43701 | 26135 | 0.522 | 117577 |
| Apr 2006 | 176 | 44562 | 41981 | 25311 | 0.516 | 112030 |
| May 2006 | 140 | 44293 | 39895 | 24855 | 0.527 | 109183 |
| Jun 2006 | 145 | 40656 | 36875 | 23384 | 0.525 | 101060 |

|          |     |       |       |       |       |        |
|----------|-----|-------|-------|-------|-------|--------|
| Jul 2006 | 165 | 39056 | 34988 | 22017 | 0.529 | 96226  |
| Aug 2006 | 145 | 36989 | 34856 | 22386 | 0.516 | 94376  |
| Sep 2006 | 144 | 31955 | 31317 | 19595 | 0.506 | 83011  |
| Oct 2006 | 149 | 29336 | 31130 | 20308 | 0.486 | 80923  |
| Nov 2006 | 90  | 20686 | 24307 | 18999 | 0.461 | 64082  |
| Dec 2006 | 49  | 9386  | 13827 | 19137 | 0.406 | 42399  |
| Jan 2007 | 169 | 54468 | 50694 | 25406 | 0.519 | 130737 |
| Feb 2007 | 120 | 41935 | 38340 | 18879 | 0.523 | 99274  |
| Mar 2007 | 157 | 45043 | 45382 | 23946 | 0.499 | 114528 |
| Apr 2007 | 153 | 43126 | 46156 | 24512 | 0.484 | 113947 |
| May 2007 | 183 | 42422 | 44933 | 24836 | 0.487 | 112374 |
| Jun 2007 | 140 | 39567 | 42830 | 24194 | 0.481 | 106731 |
| Jul 2007 | 152 | 36668 | 39627 | 23421 | 0.482 | 99868  |
| Aug 2007 | 158 | 35694 | 39049 | 23159 | 0.479 | 98060  |
| Sep 2007 | 191 | 31787 | 34878 | 20651 | 0.478 | 87507  |
| Oct 2007 | 197 | 29649 | 33367 | 21379 | 0.472 | 84592  |
| Nov 2007 | 141 | 21982 | 27513 | 21300 | 0.446 | 70936  |
| Dec 2007 | 66  | 8653  | 14449 | 22237 | 0.376 | 45405  |
| Jan 2008 | 230 | 50247 | 50245 | 23903 | 0.501 | 124625 |
| Feb 2008 | 170 | 44510 | 44814 | 21152 | 0.499 | 110646 |
| Mar 2008 | 190 | 45341 | 49927 | 25804 | 0.477 | 121262 |
| Apr 2008 | 206 | 42734 | 47950 | 24372 | 0.472 | 115262 |
| May 2008 | 255 | 42086 | 44862 | 23630 | 0.486 | 110833 |
| Jun 2008 | 191 | 39235 | 40762 | 21756 | 0.492 | 101944 |



|          |     |       |       |       |       |        |
|----------|-----|-------|-------|-------|-------|--------|
| Jul 2008 | 155 | 37902 | 39083 | 21748 | 0.493 | 98888  |
| Aug 2008 | 176 | 36811 | 37216 | 21151 | 0.498 | 95354  |
| Sep 2008 | 159 | 33716 | 34529 | 19412 | 0.495 | 87816  |
| Oct 2008 | 160 | 32699 | 33514 | 20311 | 0.495 | 86684  |
| Nov 2008 | 115 | 23488 | 26650 | 19299 | 0.470 | 69552  |
| Dec 2008 | 61  | 9945  | 14887 | 21781 | 0.402 | 46674  |
| Jan 2009 | 101 | 46112 | 44675 | 11762 | 0.508 | 102650 |
| Feb 2009 | 91  | 39784 | 40331 | 11700 | 0.497 | 91906  |
| Mar 2009 | 87  | 46477 | 48427 | 12859 | 0.490 | 107850 |
| Apr 2009 | 104 | 45902 | 47328 | 12455 | 0.493 | 105789 |
| May 2009 | 94  | 43852 | 41957 | 11787 | 0.512 | 97690  |
| Jun 2009 | 104 | 42518 | 39554 | 11195 | 0.519 | 93371  |
| Jul 2009 | 91  | 41787 | 37568 | 10941 | 0.527 | 90387  |
| Aug 2009 | 100 | 40956 | 36494 | 10786 | 0.529 | 88336  |
| Sep 2009 | 98  | 37188 | 33242 | 9513  | 0.529 | 80041  |
| Oct 2009 | 75  | 37404 | 32226 | 9769  | 0.538 | 79474  |
| Nov 2009 | 80  | 32667 | 29281 | 9548  | 0.528 | 71576  |
| Dec 2009 | 99  | 25729 | 27563 | 14477 | 0.484 | 67868  |
| Jan 2010 | 113 | 46027 | 41432 | 8445  | 0.527 | 96017  |
| Feb 2010 | 75  | 39537 | 35789 | 6526  | 0.525 | 81927  |
| Mar 2010 | 144 | 44003 | 44080 | 8661  | 0.500 | 96888  |
| Apr 2010 | 144 | 42584 | 43280 | 8475  | 0.497 | 94483  |
| May 2010 | 143 | 42559 | 41222 | 8736  | 0.509 | 92660  |
| Jun 2010 | 175 | 40129 | 38704 | 7787  | 0.510 | 86795  |

|          |     |       |       |       |       |       |
|----------|-----|-------|-------|-------|-------|-------|
| Jul 2010 | 154 | 38230 | 35961 | 7543  | 0.516 | 81888 |
| Aug 2010 | 136 | 38335 | 34559 | 7784  | 0.527 | 80814 |
| Sep 2010 | 135 | 35231 | 31986 | 7112  | 0.525 | 74464 |
| Oct 2010 | 134 | 36246 | 31245 | 7618  | 0.538 | 75243 |
| Nov 2010 | 153 | 31048 | 29452 | 7947  | 0.514 | 68600 |
| Dec 2010 | 111 | 22748 | 25849 | 12863 | 0.469 | 61571 |
| Jan 2011 | 140 | 42120 | 41379 | 6831  | 0.505 | 90470 |
| Feb 2011 | 149 | 39523 | 40357 | 6070  | 0.496 | 86099 |
| Mar 2011 | 154 | 40226 | 46714 | 7093  | 0.464 | 94187 |
| Apr 2011 | 166 | 37055 | 44848 | 7007  | 0.454 | 89076 |
| May 2011 | 167 | 37233 | 43548 | 6837  | 0.462 | 87785 |
| Jun 2011 | 166 | 34992 | 39690 | 6392  | 0.470 | 81240 |
| Jul 2011 | 145 | 32884 | 38172 | 6121  | 0.464 | 77322 |
| Aug 2011 | 164 | 32629 | 37372 | 6363  | 0.467 | 76528 |
| Sep 2011 | 140 | 29947 | 34888 | 5947  | 0.463 | 70922 |
| Oct 2011 | 175 | 30632 | 36175 | 6741  | 0.460 | 73723 |
| Nov 2011 | 155 | 25167 | 33875 | 7721  | 0.428 | 66918 |
| Dec 2011 | 123 | 17415 | 27981 | 13486 | 0.385 | 59005 |
| Jan 2012 | 179 | 37588 | 50001 | 6226  | 0.430 | 93994 |
| Feb 2012 | 181 | 34643 | 49206 | 6696  | 0.414 | 90726 |
| Mar 2012 | 228 | 34606 | 53807 | 7517  | 0.393 | 96158 |
| Apr 2012 | 181 | 32707 | 50534 | 6837  | 0.394 | 90259 |
| May 2012 | 222 | 32152 | 48851 | 6841  | 0.399 | 88066 |
| Jun 2012 | 174 | 29407 | 43573 | 6348  | 0.404 | 79502 |

|          |     |       |       |       |       |       |
|----------|-----|-------|-------|-------|-------|-------|
| Jul 2012 | 209 | 28869 | 42197 | 6078  | 0.408 | 77353 |
| Aug 2012 | 220 | 28224 | 41234 | 5901  | 0.408 | 75579 |
| Sep 2012 | 182 | 24994 | 37606 | 5475  | 0.401 | 68257 |
| Oct 2012 | 182 | 25815 | 39294 | 6394  | 0.398 | 71685 |
| Nov 2012 | 180 | 21343 | 34483 | 6841  | 0.384 | 62847 |
| Dec 2012 | 142 | 16145 | 30175 | 10620 | 0.351 | 57082 |
| Jan 2013 | 218 | 31079 | 50585 | 6657  | 0.382 | 88539 |
| Feb 2013 | 134 | 27045 | 44180 | 5198  | 0.381 | 76557 |
| Mar 2013 | 183 | 28786 | 49909 | 6377  | 0.367 | 85255 |
| Apr 2013 | 204 | 28401 | 49558 | 6232  | 0.366 | 84395 |
| May 2013 | 216 | 28847 | 46471 | 6318  | 0.385 | 81852 |
| Jun 2013 | 218 | 26799 | 42839 | 5913  | 0.387 | 75769 |
| Jul 2013 | 225 | 26665 | 41846 | 6069  | 0.391 | 74805 |
| Aug 2013 | 206 | 26275 | 41443 | 6071  | 0.390 | 73995 |
| Sep 2013 | 211 | 24216 | 38976 | 5920  | 0.385 | 69323 |
| Oct 2013 | 228 | 23782 | 40359 | 6358  | 0.373 | 70727 |
| Nov 2013 | 200 | 19400 | 36265 | 6953  | 0.351 | 62818 |
| Dec 2013 | 177 | 15615 | 33029 | 11578 | 0.323 | 60399 |
| Jan 2014 | 193 | 28851 | 53092 | 6992  | 0.354 | 89128 |
| Feb 2014 | 189 | 24965 | 46226 | 5773  | 0.352 | 77153 |
| Mar 2014 | 224 | 25861 | 51491 | 6897  | 0.336 | 84473 |
| Apr 2014 | 232 | 24837 | 49441 | 7033  | 0.336 | 81543 |
| May 2014 | 181 | 24970 | 47447 | 6932  | 0.346 | 79530 |
| Jun 2014 | 146 | 23885 | 45367 | 6968  | 0.346 | 76366 |

|          |     |       |       |       |       |       |
|----------|-----|-------|-------|-------|-------|-------|
| Jul 2014 | 177 | 22976 | 44467 | 6987  | 0.342 | 74607 |
| Aug 2014 | 172 | 22171 | 42270 | 6531  | 0.346 | 71144 |
| Sep 2014 | 191 | 20109 | 40475 | 6312  | 0.334 | 67087 |
| Oct 2014 | 210 | 20189 | 41380 | 6677  | 0.330 | 68456 |
| Nov 2014 | 211 | 16611 | 36160 | 6967  | 0.318 | 59949 |
| Dec 2014 | 197 | 14676 | 34341 | 10731 | 0.302 | 59945 |
| Jan 2015 | 240 | 25234 | 52912 | 7100  | 0.325 | 85486 |
| Feb 2015 | 163 | 20133 | 42711 | 5096  | 0.322 | 68103 |
| Mar 2015 | 268 | 23608 | 53752 | 6776  | 0.308 | 84404 |
| Apr 2015 | 243 | 22381 | 50436 | 6562  | 0.310 | 79622 |
| May 2015 | 266 | 22426 | 48517 | 6700  | 0.319 | 77909 |
| Jun 2015 | 203 | 22032 | 46558 | 6570  | 0.323 | 75363 |
| Jul 2015 | 253 | 21545 | 45164 | 6573  | 0.326 | 73535 |
| Aug 2015 | 210 | 20566 | 43211 | 6215  | 0.325 | 70202 |
| Sep 2015 | 252 | 18789 | 40529 | 6016  | 0.320 | 65586 |
| Oct 2015 | 243 | 18520 | 40280 | 6470  | 0.318 | 65513 |
| Nov 2015 | 259 | 16031 | 37816 | 6582  | 0.301 | 60688 |
| Dec 2015 | 225 | 13078 | 34028 | 10273 | 0.281 | 57604 |

1

## 2 References

- 3 1. Zhang LX. Pulmonary tuberculosis. In: Ye RG, Lu ZY, editors. Internal medicine.
- 4 Beijing: People's Medical Publishing House Press; 2004. p.39-56.

1 2. National Bureau of Statistics of the People's Republic of China. Census data.

2 <http://www.stats.gov.cn/tjsj/pcsj/>. Accessed 21 Apr 2018.

3
